# Supplementary material for: An Ultra-Sensitive Technique: Using Pv-mtCOX1 qPCR to Detect Early Recurrences of Plasmodium vivax in Patients in the Brazilian Amazon
Source: PubMed Central journal article supplement (PMC7823330; doi:10.3390/pathogens10010019), 2020-12-30
Supplement: pathogens-10-00019-s001.pdf [file pathogens-10-00019-s001.pdf]

**Table S1.** Oligonucleotide primers and probes used in qPCR assays.

|        | Primer          | Sequence 5' - 3'                    |
|--------|-----------------|-------------------------------------|
| Pv 18S | VIVAX_Fw        | GCT TTG TAA TTG GAA TGA TGG GAA T   |
|        | VIVAX_Rev       | ATG CGC ACA AAG TCG ATA CGA AG      |
|        | VIVAX_Probe     | VIC-AGC AAC GCT TCT AGC TTA-MGB-NFQ |
| Pv Mt  | PvMt_cox1_Fw    | TTATATCCACCATTAAGTACATCACTT         |
|        | PvMt_cox1_Rv    | AACCTTTAGATCTTAGATGCATTACA          |
|        | PvMt_cox1_Probe | FAM-CCTGTTGCAGTAGATGTTATCATTG-BHQ1  |

Gruenberg et al., 2018 [14].

**Table S2.** Recurrence of patients that were positive when tested using *Pv*-mtCOX1 qPCR on D28 and reported on the SIVEP-Malaria database (TBS) up to 180 days after follow-up.

| Day of SIVEP-Malaria report   | No. of positive samples by <i>Pv</i> -mtCOX1 qPCR on D28<br>n (%) | Light microscopy on D28 |
|-------------------------------|-------------------------------------------------------------------|-------------------------|
| No notification in the system | 10/29 (35)                                                        | Negative                |
| D28                           | 5/29 (17)                                                         | Positive                |
| D29-D34                       | 6/29 (21)                                                         | Negative                |
| D35-D42                       | 6/29 (21)                                                         | Negative                |
| D98                           | 1/29 (3)                                                          | Negative                |
| D129                          | 1/29 (3)                                                          | Negative                |
